# Supplementary material for: High selectivity of a novel D–A structured copolymer as a gas chromatographic stationary phase toward aromatic isomers
Source: Royal Society of Chemistry journal article supplement (doi:10.1039/d2nj00724j), 2022-01-01
Supplement: d2nj00724j1.pdf [file d2nj00724j1.pdf]

## Supplementary Information

### High selectivity of a novel D-A structured copolymer as gas chromatographic stationary phase toward aromatic isomers

Yongrui He<sup>a,b</sup>, Bing Zheng<sup>c</sup>, Meiling Qi<sup>a\*</sup>, Lijun Huo<sup>c\*</sup>

*<sup>a</sup>Key Laboratory of Cluster Science, Ministry of Education of China, School of Chemistry and Chemical Engineering and Analysis & Testing Center, Beijing Institute of Technology, Beijing, 100081, China.*

*<sup>b</sup>School of Pharmacy, Weifang Medical University Weifang, 261053, China.*

*<sup>c</sup>School of Chemistry Beihang University, Beijing 100191, China.*

\*Corresponding authors.

*E-mail addresses:* mlqi@bit.edu.cn (M. Qi), huolijun@buaa.edu.cn

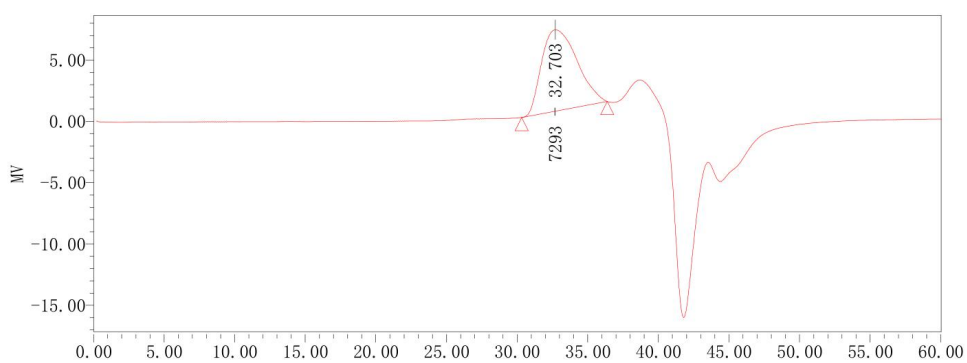

**Fig. S1.** GPC curve of PBDB-T.

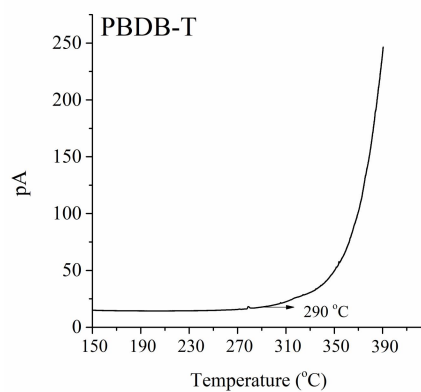

**Fig. S2.** Column bleeding curves of the PBDB-T column.

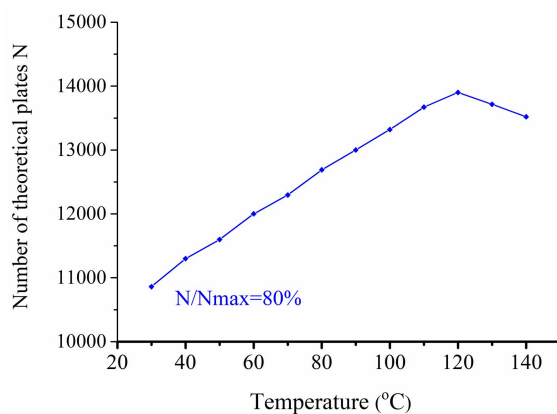

**Fig. S3.** Determination of minimum allowable operating temperature (MiAOT) of the PBDB-T column by naphthalene.

**Table S1**

Repeatability and reproducibility of the PBDB-T capillary column on the retention times ( $t_R$ , min) of the indicated isomers ( $n = 5$ ).

| Analytes           | Run-to-run  |         | Day-to-day  |         | Column-to-column |         |
|--------------------|-------------|---------|-------------|---------|------------------|---------|
|                    | $t_R$ (min) | RSD (%) | $t_R$ (min) | RSD (%) | $t_R$ (min)      | RSD (%) |
| Chloronitrobenzene |             |         |             |         |                  |         |
| <i>o</i> -         | 14.857      | 0.02    | 14.853      | 0.21    | 14.845           | 3.9     |
| <i>m</i> -         | 15.106      | 0.04    | 15.104      | 0.25    | 15.007           | 3.4     |
| <i>p</i> -         | 15.728      | 0.05    | 15.724      | 0.34    | 15.719           | 3.6     |
| Bromonitrobenzene  |             |         |             |         |                  |         |
| <i>m</i> -         | 8.067       | 0.03    | 8.064       | 0.22    | 8.057            | 2.9     |
| <i>p</i> -         | 8.239       | 0.03    | 8.235       | 0.32    | 8.228            | 3.0     |
| <i>o</i> -         | 10.052      | 0.04    | 10.049      | 0.35    | 10.041           | 3.5     |
